# Supplementary material
Source: publisher site journal article supplement (https://www.dovepress.com/get_supplementary_file.php?f=470538.docx)
Supplement: Supplementary file 1 [file get_supplementary_file.php]

**Supplemental Table.** Which of the following formal leadership positions are you most interested in pursuing in the future? 1 = Not interested at all, 5 = Extremely interested

| **Variable** | **N** | **Pre-program** | | **Post-program** | | ***p-*value** |
| --- | --- | --- | --- | --- | --- | --- |
|  |  | **Mean** | **SD** | **Mean** | **SD** |  |
| Clinical program leadership | 34 | 2.9 | 1.5 | 2.6 | 1.4 | 0.411 |
| Educational program leadership | 33 | 2.6 | 1.3 | 2.4 | 1.2 | 0.344 |
| Research program leadership | 35 | 3.0 | 1.2 | 3.3 | 1.3 | 0.142 |
| Division Chief | 34 | 2.2 | 1.3 | 2.5 | 1.3 | 0.091 |
| Department Director | 34 | 2.1 | 1.3 | 2.2 | 1.4 | 0.292 |
| Other leadership role in your department or division | 32 | 3.3 | 1.2 | 3.4 | 1.1 | 0.448 |
| School of Medicine leadership position (outside your department) | 34 | 2.8 | 1.2 | 2.5 | 1.2 | 0.237 |
| University leadership position (outside the School of Medicine) | 34 | 2.3 | 1.1 | 2.3 | 1.1 | 0.789 |
| Hospital Health System leadership position | 33 | 1.9 | 1.2 | 1.8 | 1.2 | 0.752 |
| Leadership in a professional society | 34 | 3.9 | 1.2 | 3.9 | 1.1 | 0.827 |

Standard deviation, SD.

**Appendix 1.** Questionnaire

Q1 Thank you for participating in the Early Career Women’s Leadership Program by Women in Medicine and Science in the Office of Faculty. We also thank you for helping us evaluate and improve the program.

May we use your answers for research purposes? All data will remain anonymous and analyzed only in the aggregate.

- Yes (1) – I consent to participate in this research study (principal investigator: Jennifer Lee, MD; Senior Associate Dean for OWISM; IRB 00340091).
- No (2) – I do not consent to be part of the research study. My answers will be used only for internal purposes to improve future programs.

Q2 How do you think about yourself in regards to advancing your career and/or becoming or being a leader? *Pre-program question*

________________________________________________________________

________________________________________________________________

Q3 If you imagine the ideal leadership position(s) for yourself, what would it look like? How do you think you could get this position? Please describe your ideal leadership position and the keys to you successfully obtaining this position. *Pre-program question*

________________________________________________________________

________________________________________________________________

________________________________________________________________

Q4 To what extent do each of the following align or conflict with your aspirations for leadership? *Pre-program and post-program question*

|  | Very conflicted (1) | More conflicted than aligned (2) | Neutral (3) | More aligned than conflicted (4) | Very aligned (5) |
| --- | --- | --- | --- | --- | --- |
| Goals as a researcher (1) |  |  |  |  |  |
| Goals as a clinician (2) |  |  |  |  |  |
| Goals as an educator (3) |  |  |  |  |  |
| Goals as an administrator (4) |  |  |  |  |  |
| Relationships with family (5) |  |  |  |  |  |
| Home or family responsibilities (6) |  |  |  |  |  |
| Relationships with friends (7) |  |  |  |  |  |
| Achieving physical well-being (8) |  |  |  |  |  |
| Achieving mental well-being (9) |  |  |  |  |  |
| Achieving spiritual well-being (10) |  |  |  |  |  |
| Financial goals (11) |  |  |  |  |  |
| Pursuit of recreation/hobbies (12) |  |  |  |  |  |
| Other factors (please describe) (13) |  |  |  |  |  |

________________

Q5 How do your personal goals, commitments, interests, and/or values align or conflict with your goals to obtain a leadership position? *Pre-program and post-program question*

________________________________________________________________

________________________________________________________________

Q6 Do you currently hold any recognized leadership position(s)? *Pre-program question*

- Yes (1)
- No (2)

Display This Question:

If Do you currently hold any leadership position(s)? = Yes

Q7 Please provide the title(s) of your current leadership position(s):

________________________________________________________________

________________________________________________________________

Q8 Which of the following formal leadership positions are you most interested in pursuing in the future? *Pre-program and post-program question*

|  | Not interested at all (1) | Mildly interested (2) | Moderately interested (3) | Very interested (4) | Extremely interested (5) | Prefer to not answer (6) |
| --- | --- | --- | --- | --- | --- | --- |
| Clinical program leadership (1) |  |  |  |  |  |  |
| Educational program leadership (2) |  |  |  |  |  |  |
| Research program leadership (3) |  |  |  |  |  |  |
| Division Chief (4) |  |  |  |  |  |  |
| Department Director/Chair (5) |  |  |  |  |  |  |
| Other leadership role in your Department/Division (6) |  |  |  |  |  |  |
| JHU School of Medicine leadership position (outside your Department) (7) |  |  |  |  |  |  |
| JHU leadership position (outside the School of Medicine) (8) |  |  |  |  |  |  |
| Johns Hopkins Health System (JHHS) leadership position (9) |  |  |  |  |  |  |
| Leadership in a professional society (10) |  |  |  |  |  |  |
| Other recognized leadership role (11)  Please describe___ |  |  |  |  |  |  |

Q9 How much would each of the following factors be a barrier for you to pursue a career opportunity (e.g. applying for a program leadership position, seeking promotion, or applying to a leadership position in your Department, School, or health system)? *Pre-program question*

|  | Not a barrier at all (1) | Minor barrier (2) | Moderate barrier (3) | Significant barrier (4) | Nearly insurmountable barrier (5) |
| --- | --- | --- | --- | --- | --- |
| Gender bias against women in leadership (1) |  |  |  |  |  |
| Masculine culture or norms in leadership (2) |  |  |  |  |  |
| Lack of women leader role models (3) |  |  |  |  |  |
| Difficulty in finding a community of women leaders to join (4) |  |  |  |  |  |
| Competitive or individualistic culture (5) |  |  |  |  |  |
| Lack of mentorship (6) |  |  |  |  |  |
| Lack of sponsorship (i.e. having a person in a position of power/ influence advocate for my advancement or opportunities) (7) |  |  |  |  |  |
| Lack of transparency around leadership (8) |  |  |  |  |  |
| Not being part of power networks that influence leadership opportunities (9) |  |  |  |  |  |
| Lack of turnover in leadership roles (10) |  |  |  |  |  |
| Difficulty transitioning out of my current professional responsibilities to assume new ones (11) |  |  |  |  |  |
| Stigma around work-home life integration (12) |  |  |  |  |  |
| Other (please describe) (13)  ___________ |  |  |  |  |  |

Q10 Please briefly describe what you are hoping to gain from participating in this program. *Pre-program question*

________________________________________________________________

________________________________________________________________

Q11 How would you rate yourself in the following areas? *Pre-program and post-program question*

|  | Very low (1) | Low (2) | Medium (3) | High (4) | Very high (5) |
| --- | --- | --- | --- | --- | --- |
| Developing a mission statement (1) |  |  |  |  |  |
| Understanding gender-based communication differences (2) |  |  |  |  |  |
| Negotiation skills (3) |  |  |  |  |  |
| Advocating for your own career advancement (4) |  |  |  |  |  |
| Awareness of issues encountered by people who are underrepresented in medicine (5) |  |  |  |  |  |
| Prioritizing and time management (6) |  |  |  |  |  |
| Balancing work and personal life (7) |  |  |  |  |  |
| Enhancing the well-being of those you work with (8) |  |  |  |  |  |
| Being an effective mentee (9) |  |  |  |  |  |
| Being an effective mentor (10) |  |  |  |  |  |
| Confidence in your ability to be a leader (11) |  |  |  |  |  |
| Self-awareness (e.g. personality type, values) (12) |  |  |  |  |  |

Q12 What is your level of confidence in the following: 0-10 (where 0 = no confidence and 10 is complete confidence)*Pre- and post-program question*

1. Aligning my personal and professional values
2. Challenging my personal beliefs
3. Articulating my personal beliefs
4. Changing my assumption-making tendencies
5. Reframing the obstacles I routinely encounter
6. Articulating my career vision
7. Stating my career goals
8. Adhering to an action plans/tactics

Q13 Please answer the following questions about your experience in this program

Q14 Please describe overall how this program influenced you. *Post-program question*

________________________________________________________________

________________________________________________________________

Q15 One important goal for this program is to create a supportive learning community and environment for women faculty. Please describe how you felt about the learning community and how this compared to the community/environment that you typically experience at Johns Hopkins. *Post-program question*

________________________________________________________________

________________________________________________________________

Q16 Based on your participation in this program, please name 1 specific change or action you plan for each of the following time frames: *Post-program question*

- Within 1 month (1) __________________________________________________
- Within the next 6 months (2) __________________________________________________
- Within the next 1 year (3) __________________________________________________

Q17 What aspects of participating in the program were most helpful to you and why? *Post-program question*

________________________________________________________________

________________________________________________________________

Q18 Please offer any specific praise about the program. *Post-program question*

________________________________________________________________

________________________________________________________________

Q19 Please offer any suggestions to improve the program. *Post-program question*

________________________________________________________________

________________________________________________________________

Q20 Finally please share some simple background information about yourself.

Which career track fits you most closely? *Pre-program question*

- Clinician (1)
- Clinician-educator (2)
- Clinician-scientist (3)
- Educator (4)
- Scientist (5)
- Other (please specify) (6) __________________________________________________

Q21 May we contact you if we have questions about your answers? *Pre-program and post-program question*

- Yes (1)
- No (2)

Q22 Please share any other comments you have before completing this survey. *Pre-program and post-program question*

________________________________________________________________

________________________________________________________________
